# Supplementary material
Source: publisher site journal article supplement (https://www.dovepress.com/article/259267)
Supplement: Supplementary file 1 [file get_supplementary_file.php]

**Appendix 1**

One of the included choice sets to eliciting the preferences of medical sciences students about work contracts in deprived areas.

| **attribute** | **Contract A** | **Contract B** |
| --- | --- | --- |
| **payment** | capitation +50% bonus | capitation +50% bonus |
| **place of medical center** | a faraway province | own province |
| **Financial Settlements** | between 15 to 30 days | between 30 to 60 days |
| **housing and transportation facilities** | No | No |
| **duration of contract** | one year | 3 years |
| **Quotations for continuing education** | after 4 years work in deprived area(s) | after 8 years work in deprived area(s) |
| **workload** | moderate | low |
| Which of contracts would you like to choose (please tick one box)? contract A ⬜ contract B ⬜ | | |
